1  
2  
3  
4  
5  
6  
7  
8  
9  
10  
11  
12  
13  
14  
15  
16  
17  
18  
19  
20  
21  
22  
23  
24  
25  
26  
27  
28  
29  
30  
31  
32  
33  
34  
35  
36  
37  
38  
39  
40  
41  
42  
43  
44  
45  
46  
47  
48  
49  
50  
51

### **A neural correlate of image memorability**

Andrew Jaegle<sup>\*1</sup>, Vahid Mehrpour<sup>\*1</sup>, Yalda Mohsenzadeh<sup>\*2</sup>, Travis Meyer<sup>1</sup>, Aude Oliva<sup>2</sup>, Nicole Rust<sup>1</sup>

<sup>\*</sup>=Authors contributed equally. Listed in alphabetical order.

<sup>1</sup>Department of Psychology, University of Pennsylvania

<sup>2</sup>Computer Science & Artificial Intelligence Laboratory, Massachusetts Institute of Technology

**Some images are easy to remember while others are easily forgotten. While variation in image memorability is consistent across individuals, we lack a full account of its neural correlates. By analyzing data collected from inferotemporal cortex (IT) as monkeys performed a visual memory task, we demonstrate that a simple property of the visual encoding of an image, its population response magnitude, is strongly correlated with its memorability. These results establish a novel behavioral role for the magnitude of the IT response, which lies largely orthogonal to the coding scheme that IT uses to represent object identity. To investigate the origin of IT memorability modulation, we also probed convolutional neural network models trained to categorize objects. We found brain-analogous correlates of memorability that grew in strength across the hierarchy of these networks, suggesting that this memorability correlate is likely to arise from the optimizations required for visual as opposed to mnemonic processing.**

We have a remarkable ability to remember the images that we have seen, even after a single viewing [1, 2]. Although this capacity appears general and may serve a wide variety of functions, we remember some images better than others [3]. Image memorability is consistent across individuals [3, 4], however, a full account of the sources of image memorability has remained elusive. For example, while some types of natural image content are known to impact memorability – such as images with people, which tend to be more memorable than scenes [3], and abnormal objects, such as chair shaped like a hand, which tend to be more memorable than typical objects [4] – we lack a complete account of how image content determines image memorability.

What neural processes determine memorability? The sources of memorability could range from variation in the perceptual organization of images in visual cortex to the processes that support memory formation and/or memory recall. The neural correlates of memorability are likely to reside at higher stages of the visual form processing pathway, where image memorability can be decoded from human fMRI activity patterns [5, 6], and more memorable images evoke larger fMRI BOLD responses [5]. However, we lack a deeper understanding of how the representations of memorable and non-memorable images differ. Similarly, some insight into the neural correlates of memorability can be gained from convolutional neural network (CNN) models trained for object classification, which have been demonstrated to mimic other (i.e. object identity) representations in the form-processing pathway (reviewed by [7]). Image memorability can be reasonably decoded from the higher layers of at least one of these networks [8], but we do not understand how memorability is reflected in this CNN nor whether this CNN reflects memorability like the brain.

The fact that image memorability is linearly decodable in higher visual brain areas such as inferotemporal cortex (IT) [5, 6] could imply that information about image memorability is

52 represented in the same fashion as information about object identity in these areas. Within IT,  
53 representations of image and object identity are generally thought to be encoded as different  
54 patterns of spikes across the IT population, consistent with neurons that are individually “tuned”  
55 for distinct image and object properties. In a population representational space, these distinct  
56 spike patterns translate into population response vectors that point in different directions, and  
57 information about object identity is formatted such that it can be accessed from IT neural  
58 responses via a weighted linear decoder (Fig. 1a; reviewed by [9]). Similarly, image  
59 memorability could be represented by population vector direction in IT. However, under this  
60 proposal, it is not clear how our experience of image identity and image memorability would be  
61 represented as by the same population of neurons, i.e. the fact that one image of a person can  
62 be more memorable than another image of that same person, and at the same time, identity  
63 information, such as the class of an object, explains only a limited amount of how memorable an  
64 image will be [3].

65  
66 Here we present an alternative proposal, hinted at by the fact that more memorable images  
67 evoke larger fMRI responses [5]: we propose that memorability variation is determined  
68 principally by the magnitude of the IT population response, or similarly, the total number of  
69 spikes across the IT population (Fig. 1). This scenario is consistent with general accounts in  
70 which visual perceptual processing precedes memory storage and images that evoke larger  
71 numbers of spikes, and consequently have more robust visual representations, are remembered  
72 best. This scenario incorporates a representational scheme for memorability that is orthogonal  
73 to the scheme IT uses to support object identity, and it is thus attractive from the perspective  
74 that it would provide a straightforward account of how IT multiplexes visual information about  
75 image content (as the population vector direction) as well as memorability (as population vector  
76 magnitude). The plausibility of this scenario rests on whether there is sufficient variation in  
77 population response magnitude across the class of natural images to account for memorability,  
78 given the host of homeostatic and normalization mechanisms that act to maintain constant  
79 grand mean firing rates across a cortical population [10].

80  
81



82  
83  
84  
85  
86  
87  
88

**Figure 1.** *The hypothesis: the magnitude of the IT population response encodes image memorability.* In geometric depictions of how IT represents image identity, the population response to an image is depicted as a vector in an N-dimensional space, where N indicates the number of neurons in the population, and identity is encoded by the direction of the population vector. Here we test the hypothesis

89 that image memorability is encoded by the magnitude (or equivalently length) of the IT population vector,  
90 where images that produce larger population responses are more memorable.

91  
92  
93 To test the hypothesis presented in Fig. 1, we obtained image memorability scores by passing  
94 images through a model designed to predict image memorability for humans ([4]; Supp. Fig. 1).  
95 The neural data, also reported in [11], were recorded from IT as two rhesus monkeys performed  
96 a single-exposure visual memory task in which they reported whether images were novel (never  
97 before seen) or were familiar (seen once previously; Fig. 2a). In each experimental session,  
98 neural populations with an average size of 26 units were recorded, across 27 sessions in total.  
99 After screening for responsive units, data were concatenated across sessions into a larger  
100 pseudopopulation in a manner that aligned images with similar memorability scores (see  
101 Methods and Supp. Fig. 1). The resulting pseudopopulation contained the responses of 707 IT  
102 units to 107 images, averaged across novel and familiar presentations.

103  
104



105  
106 **Figure 2. IT population response magnitude strongly correlates with image memorability.** a) The  
107 monkeys' task involved viewing each image for 400 ms and then reporting whether the image was novel  
108 or familiar with an eye movement to one of two response targets. The probability of a novel versus  
109 familiar image was fixed at 50% and images were repeated with delays ranging from 0 to 63 intervening

110 trials (4.5 s to 4.8 min). Shown are 5 example trials with image memorability scores labeled. The  
111 memorability of each image was scored from 0-1, where the score reflects the predicted chance-  
112 corrected hit rate for detecting a familiar image (i.e., 0 maps to chance and 1 maps to ceiling, [4]). **b)** The  
113 relationship between image memorability scores and IT population response magnitudes. Each point  
114 corresponds to a different image (N=107 images). Population response magnitudes were computed as  
115 the L2 norm ( $\sqrt{\sum_{i=1}^N r_i^2}$ ), where  $r_i$  is the spike count response of the  $i$ th unit, across a pseudopopulation of  
116 707 units. Spikes were counted in an 80 ms window positioned 180 to 260 ms following stimulus onset  
117 (see Supp. Fig 2c for different window positions). The Pearson correlation and its p-value are labeled.  
118 The solid line depicts the linear regression fit to the data. For reference, the mean firing rates for two  
119 example images are also labeled (see also Supp. Fig 3b). **c)** Mean and standard error (across  
120 experimental sessions) of monkey behavioral performance on the memory task as a function of human-  
121 based image memorability scores. Performance was binned across images with neighboring memorability  
122 scores and pooled across monkeys (see Supp. Fig 4 for plots by individual). The dashed line corresponds  
123 to the grand average performance, and if there were no correlation, all points should fall near this line.  
124 The point-biserial correlation and its p-value, computed for the raw data (i.e. continuous memorability  
125 scores and binary performance values for each image in each session) are labeled.

126  
127  
128 Fig. 2b shows the correlation between image memorability and IT population response  
129 magnitudes, which was strong and highly significant (Pearson correlation:  $r = 0.68$ ;  $p = 1 \times 10^{-15}$ ).  
130 This correlation remained strong when parsed by the data collected from each monkey  
131 individually (Supp. Fig. 2a-b) and, after accounting for the time required for signals to reach IT,  
132 across the entire 400 ms viewing period (Supp. Fig. 3a). The correlation also remained strong  
133 when computed for a quantity closely related to response magnitude, grand mean firing rate  
134 (Supp. Fig. 3b), as well as when the highest firing units were excluded from the analysis (Supp.  
135 Fig. 3c).

136  
137 The strength of the correlation between memorability and IT response magnitude is notable  
138 given the species difference, as the memorability scores were derived from a model designed to  
139 predict what humans find memorable whereas the neural data were collected from rhesus  
140 monkeys. Likewise, we found that estimates of human memorability scores were predictive of  
141 the images that the monkeys found most memorable during the single-exposure visual memory  
142 task (Fig. 2c).

143  
144 As described above, image memorability can be reasonably decoded from at least one CNN  
145 trained to categorize objects and scenes, but not explicitly to score memorability [8]. This hints  
146 at the fact that the neural correlate of memorability variation may be a consequence of the  
147 optimizations required for visual (as opposed to mnemonic) processing, however, before making  
148 this conclusion, one would want to establish that this CNN reflects memorability in a manner  
149 analogous to the brain. We found that this was the case: the correlation between image  
150 memorability scores and their corresponding population response magnitudes was significantly  
151 higher in the trained as compared to a randomly initialized version of the network in all layers,  
152 and the strength of this correlation generally increased across the hierarchy (Fig. 3). These  
153 results were also replicated in other CNNs trained for object classification, where correlation  
154 strength also systematically increased across the hierarchy throughout much of the network  
155 (Supp. Fig. 4), suggesting that this signature is not unique to this particular architecture or  
156 training procedure. These results suggest that variation in population response magnitude  
157 across images is likely to be a natural consequence of visual systems that classify objects, and  
158 that this variation is directly related to variation in image memorability.

159  
160



161  
162  
163  
164  
165  
166  
167  
168  
169

**Figure 3.** Correlations between memorability and population response increase in strength across layers of a CNN trained to classify objects and scenes. Mean and 95% CIs of the Pearson correlations between image memorability and population response magnitude for each hierarchical layer of the CNN described in [8], up to the last hidden layer. “Conv”: convolutional layer; “FC”: fully connected layer. p-values for a one-sided comparison that correlation strength was larger for the trained than the randomly connected network:  $p < 0.0001$  for all layers.

170

## Discussion

171  
172

Here we have demonstrated that variation in the ability of humans and monkeys to remember images is strongly correlated with the magnitude of the population response in IT cortex. These results indicate that memorability is reflected in IT via a representational scheme that lies largely orthogonal to the one IT uses for encoding object identity (Fig. 1). For example, investigations of how monkey IT and its human analogs represent objects using ‘representational similarity analysis’ typically begin by normalizing population response vector magnitude to be the same for all images such that all that is left is the direction of the population response pattern, under the assumption that population vector magnitude is irrelevant for encoding object or image identity [12]. Before our study, data from human fMRI had pinpointed the locus of memorability to the human analog of IT, but we did not understand “how” the representations of memorable and non-memorable images differed. Our results point to a simple and coherent account of how IT multiplexes representations of visual and memorability information using two complementary representational schemes (Fig. 1).

173  
174  
175  
176  
177  
178  
179  
180  
181  
182  
183  
184  
185

How might variation in IT population response magnitudes lead to variation in how visual memories are stored? These results are consistent with general accounts of memory in which visual processing precedes memory storage and images with more robust visual representations are those that are best remembered. Our results demonstrate that despite the host of homeostatic mechanisms that contribute to maintaining constant global firing rates across a cortical population [10], changes in image content can result in IT population response magnitudes that differ by up to 19% (Fig. 2b; Supp. Fig. 3b). Of course one naturally expects that classes of images that are known to be more robustly represented in IT should be better remembered – for example, natural images should be better remembered than their scrambled counterparts [e.g. 13]. The significance of our result follows from the unexpected finding that there is variation in the robustness of visual representations within the class of natural images

186  
187  
188  
189  
190  
191  
192  
193  
194  
195  
196  
197

198 that correlates with our understanding of the content that makes images more or less  
199 memorable. For example, unusual objects, such as a chair shaped like a hand, are known to be  
200 more memorable than typical objects, but the fact that unusual objects have more robust visual  
201 representations has not been previously established. As such, our results give insight not only  
202 into visual memorability, but also vision itself.

203  
204 Our neural data were recorded from the brains of monkeys that could both see and remember  
205 what they had seen. To tease apart whether the origin of memorability could be attributed to  
206 optimizations for visual as opposed to mnemonic processing, we investigated CNNs optimized  
207 to categorize objects but not explicitly trained to predict the memorability of images. Prior to our  
208 study, memorability was demonstrated to be linearly decodable from higher layers of one of  
209 these CNNs, but it was unclear how memorability was reflected in this CNN and how that  
210 compared to the brain. Additionally, while this class of models has been demonstrated to mimic  
211 many aspects of how IT represents visual object identity (reviewed by [7]), image memorability  
212 has a distinct representational scheme from identity (Fig. 1), and in the context of the many  
213 illustrations that CNNs solve the same problems as brains using different strategies (e.g. [14]), it  
214 need not have been the case that CNNs reflected memorability in the same way as the brain.  
215 The fact that CNNs trained for object recognition mimic the neural representation of a distinct  
216 behavior – visual memorability – is compelling evidence that this strategy of multiplexing visual  
217 identity and memorability results from the computational requirements of optimizing for robust  
218 object representations. These modeling results also offer insight into the nature of the  
219 mechanism underlying memorability. The brain perceives and remembers using both  
220 feedforward and feedback processing, and this processing is modulated by top-down and  
221 bottom-up attention. Because of this, it is difficult to pinpoint the locus of an effect like the one  
222 we describe to any single mechanism using neural data alone. The fact that variations in  
223 response magnitudes that correlate with memorability emerge from static, feed-forward, and  
224 fixed networks suggests that memorability variation is unlikely to follow primarily from the types  
225 of attentional mechanisms that require top-down processing, recurrent processing, or plasticity  
226 beyond that required for wiring up a system to identify objects.

227

228

## 229 **FUNDING**

230 This work was supported by the National Eye Institute of the US National Institutes of Health  
231 (grant number R01EY020851); the Simons Foundation (through an award from the Simons  
232 Collaboration on the Global Brain); and the McKnight Endowment for Neuroscience.

233

## 234 **CONFLICTS OF INTEREST**

235 None.

236 **SUPPLEMENTAL FIGURES**

237  
238  
239



240  
241  
242  
243  
244  
245  
246

**Supplemental Figure 1.** Distributions of memorability scores for the images used in these experiments. Memorability scores range from 0-1, where the score reflects the predicted chance-corrected hit rate for detecting a familiar image and 0 maps to chance (see Methods and [4]).



247  
248  
249  
250  
251  
252  
253  
254  
255  
256  
257

**Supplemental Figure 2.** The correlation of memorability and population response magnitude, for each monkey individually. **a-b)** Fig 2b replotted for each monkey individually (monkey 1: 353 units; monkey 2 354 units). To compensate for parsing the data, the spike count window was increased to 250 ms in these plots (positioned 150 ms – 400 ms) relative to the 80 ms window depicted in Fig. 2. The Pearson correlation and its p-value are labeled. The following two points were included in computing the correlations but fall outside the boundaries of the plot or are obscured by text: Monkey 1 (panel a): memorability = 0.86, response magnitude = 83.6; Monkey 2 (panel b): memorability = 0.57, response magnitude = 71.5. Solid lines depict the linear regression fits to the data.



258  
259  
260 **Supplemental Figure 3.** *The correlation of memorability and the IT population response, applied to*  
261 *different time windows, assessed with firing rate, and determined with top-ranked firing units removed. a)*  
262 *The same analysis described for Fig. 2b, but applied to 80 ms windows shifted at different positions*  
263 *relative to stimulus onset, where the correlations are plotted against the center of each time bin. Fig. 2b is*  
264 *shown at the peak of this plot (220 ms). Also shown (dotted line) is the critical correlation threshold for  $p <$*   
265 *0.01, which the population reached at 80 ms following stimulus onset. b) Correlations between*  
266 *memorability and grand mean firing rate across the 707 units (in contrast to the plots of response*  
267 *magnitude in Fig. 2b). The two example images from 2b are indicated. Solid line depicts the linear*  
268 *regression fit to the data. c) The analysis in Fig. 2b with N% top-ranked firing rate units excluded from the*  
269 *pseudopopulation for different N. The dotted line indicates the critical correlation for the significance level*  
270  *$p = 0.01$ .*  
271  
272



273  
274  
275 **Supplemental Figure 4.** *Human-based memorability scores predict what monkeys find memorable.* The  
276 *analysis presented in Fig. 2c, applied to each monkey individually. To compensate for parsing the data,*  
277 *the data is parsed into 5 bins as opposed to the 7 bins in Fig. 2c. The dashed lines correspond to the*  
278 *grand average performance, and if there were no correlation, all points should fall near this line. The*  
279 *point-biserial correlation and its p-value, computed for the raw data, are labeled.*  
280  
281





282

283

284

285

286

287

288

289

290

291

292

**Supplemental Figure 5.** Correlations between memorability and population response magnitude are also reflected in two other CNNs. Mean and 95% CIs of the Pearson correlations between image memorability and population response magnitude for each hierarchical layer for two CNNs, including **a)** AlexNet [15], **b)** VGG-16 [16], up to the last hidden layer. “Conv”: convolutional layer; “FC”: fully connected layer. p-values for a one-sided comparison that correlation strength was larger for the trained than the randomly connected network, AlexNet:  $p < 0.0001$  for all layers; VGG-16:  $p = 0.8, 0.2, 0.9,$  and  $0.5$  for Conv 1.1, 1.2, 2.1, and 2.2, respectively,  $p = 0.0008$  for Conv 3.2, and  $p < 0.0001$  for all other layers.

293 **References**

- 294
- 295 1. Standing, L., *Learning 10,000 pictures*. Q J Exp Psychol, 1973. **25**(2): p. 207-22.
- 296 2. Brady, T.F., et al., *Visual long-term memory has a massive storage capacity for object*  
297 *details*. Proc Natl Acad Sci U S A, 2008. **105**(38): p. 14325-9.
- 298 3. Isola, P., et al. *What makes an image memorable?* in *IEEE Conference on Computer*  
299 *Vision and Pattern Recognition (CVPR)*. 2011.
- 300 4. Khosla, A., et al. *Understanding and predicting image memorability at a large scale*. in  
301 *International Conference on Computer Vision (ICCV)*. 2015.
- 302 5. Bainbridge, W.A., D.D. Dilks, and A. Oliva, *Memorability: A stimulus-driven perceptual*  
303 *neural signature distinctive from memory*. Neuroimage, 2017. **149**: p. 141-152.
- 304 6. Bainbridge, W.A. and J. Rissman, *Dissociating neural markers of stimulus memorability*  
305 *and subjective recognition during episodic retrieval*. Sci Rep, 2018. **8**(1): p. 8679.
- 306 7. Yamins, D.L. and J.J. DiCarlo, *Using goal-driven deep learning models to understand*  
307 *sensory cortex*. Nat Neurosci, 2016. **19**(3): p. 356-65.
- 308 8. Zhou, B., et al. *Learning deep features for scene recognition using places database*. in  
309 *Neural Information Processing Systems (NIPS)*. 2014.
- 310 9. DiCarlo, J.J., D. Zoccolan, and N.C. Rust, *How does the brain solve visual object*  
311 *recognition?* Neuron, 2012. **73**(3): p. 415-34.
- 312 10. Turrigiano, G., *Homeostatic synaptic plasticity: local and global mechanisms for*  
313 *stabilizing neuronal function*. Cold Spring Harb Perspect Biol, 2012. **4**(1): p. a005736.
- 314 11. Meyer, T. and N.C. Rust, *Single-exposure visual memory judgments are reflected in*  
315 *inferotemporal cortex*. eLife, 2018. **7**:e32259.
- 316 12. Kriegeskorte, N., M. Mur, and P. Bandettini, *Representational similarity analysis -*  
317 *connecting the branches of systems neuroscience*. Front Syst Neurosci, 2008. **2**: p. 4.
- 318 13. Rust, N.C. and J.J. Dicarlo, *Selectivity and tolerance ("invariance") both increase as*  
319 *visual information propagates from cortical area V4 to IT*. J Neurosci, 2010. **30**(39): p. 12978-95.
- 320 14. Berardino, A., et al. *Eigen-distortions of hierarchical representations*. in *Adv. Neural*  
321 *Information Processing Systems (NeurIPS\*17)*. 2017.
- 322 15. Krizhevsky, A., I. Sutskever, and G.E. Hinton. *ImageNet classification with deep*  
323 *convolutional neural networks*. . in *International Conference on Neural Information Processing*  
324 *Systems (NIPS)*. 2012.
- 325 16. Simonyan, K. and A. Zisserman. *Very deep convolutional networks for large-scale image*  
326 *recognition*. in *International Conference on Machine Learning (ICLR)*. 2015.
- 327

## 1    **METHODS:**

2  
3    As an overview, three types of data are included in this paper: 1) Behavioral and neural data  
4    collected from two rhesus monkeys that were performing a single-exposure visual memory task;  
5    2) Human-based memorability scores for the images used in the monkey experiments, and 3)  
6    The responses of units at different layers of three convolutional neural network models trained  
7    to classify objects and scenes. The Methods associated with each type of data are described  
8    below.

### 9 10    **Behavioral and neural data collected from two rhesus monkeys that were performing a** 11    **single-exposure visual memory task**

12  
13    Experiments were performed on two adult male rhesus macaque monkeys (*Macaca mulatta*)  
14    with implanted head posts and recording chambers. All procedures were performed in  
15    accordance with the guidelines of the University of Pennsylvania Institutional Animal Care and  
16    Use Committee. Monkey behavioral and neural data were also included in an earlier report that  
17    examined the relationship between behavioral reports of familiarity as a function of the time  
18    between novel and familiar presentations (e.g., “rates of forgetting”) and neural responses in IT  
19    cortex [1]. The results presented here cannot be inferred from that report.

#### 20 21    **The single-exposure visual memory task:**

22  
23    All behavioral training and testing were performed using standard operant conditioning (juice  
24    reward), head stabilization, and high-accuracy, infrared video eye tracking. Stimuli were  
25    presented on an LCD monitor with an 85 Hz refresh rate using customized software  
26    (<http://mworks-project.org>).

27  
28    Each trial of the monkeys’ task involved viewing one image for at least 400 ms and indicating  
29    whether it was novel (had never been seen before) or familiar (had been seen exactly once)  
30    with an eye movement to one of two response targets. Images were never presented more than  
31    twice (once as novel and then as familiar) during the entire training and testing period of the  
32    experiment. Trials were initiated by the monkey fixating on a red square (0.25°) on the center of  
33    a gray screen, within an invisible square window of  $\pm 1.5^\circ$ , followed by a 200 ms delay before a  
34    4° stimulus appeared. The monkeys had to maintain fixation of the stimulus for 400 ms, at which  
35    time the red square turned green (go cue) and the monkey made a saccade to the target  
36    indicating that the stimulus was novel or familiar. In monkey 1, response targets appeared at  
37    stimulus onset; in monkey 2, response targets appeared at the time of the go cue. In both  
38    cases, targets were positioned 8° above or below the stimulus. The association between the  
39    target (up vs. down) and the report (novel vs. familiar) was swapped between the two animals.  
40    The image remained on the screen until a fixation break was detected. The first image  
41    presented in each session was always a novel image. The probability of a trial containing a  
42    novel vs. familiar image quickly converged to 50% for each class. Delays between novel and  
43    familiar presentations were pseudorandomly selected from a uniform distribution, in powers of  
44    two (n-back = 1, 2, 4, 8, 16, 32 and 64 trials corresponding to mean delays of 4.5s, 9s, 18s, 36s,  
45    1.2 min, 2.4 min, and 4.8 min, respectively).

46  
47    The images used in these experiments were collected via an automated procedure that  
48    downloaded images from the Internet. Images smaller than 96\*96 pixels were not considered  
49    and eligible images were cropped to be square and resized to 256\*256 pixels. An algorithm

50 removed duplicate images. Within the training and testing history for each monkey, images were  
51 not repeated.

52  
53 The activity of neurons in IT was recorded via a single recording chamber in each monkey.  
54 Chamber placement was guided by anatomical magnetic resonance images in both monkeys.  
55 The region of IT recorded was located on the ventral surface of the brain, over an area that  
56 spanned 5 mm lateral to the anterior middle temporal sulcus and 14-17 mm anterior to the ear  
57 canals. Recording sessions began after the monkeys were fully trained on the task and after the  
58 depth and extent of IT was mapped within the recording chamber. Combined recording and  
59 behavioral training sessions happened 4-5 times per week across a span of 5 weeks (monkey  
60 1) and 4 weeks (monkey 2). Neural activity was recorded with 24-channel U-probes (Plexon,  
61 Inc) with linearly arranged recording sites spaced with 100  $\mu\text{m}$  intervals. Continuous, wideband  
62 neural signals were amplified, digitized at 40 kHz and stored using the Grapevine Data  
63 Acquisition System (Ripple, Inc.). Spike sorting was done manually offline (Plexon Offline  
64 Sorter). At least one candidate unit was identified on each recording channel, and 2-3 units were  
65 occasionally identified on the same channel. Spike sorting was performed blind to any  
66 experimental conditions to avoid bias. For quality control, recording sessions were screened  
67 based on their neural recording stability across the session, their numbers of visually responsive  
68 units, and the numbers of behavioral trials completed. A multi-channel recording session was  
69 included in the analysis if: (1) the recording session was stable, quantified as the grand mean  
70 firing rate across channels changing less than 2-fold across the session; (2) over 50% of  
71 neurons were visually responsive (a loose criterion based on our previous experience in IT),  
72 assessed by a visual inspection of rasters; and (3) the number of successfully completed  
73 novel/familiar pairs of trials exceeded 100. In monkey 1, 21 sessions were recorded and 6 were  
74 removed (2 from each of the 3 criterion). In monkey 2, 16 sessions were recorded and 4 were  
75 removed (1, 2 and 1 due to criterion 1, 2 and 3, respectively). The resulting data set included 15  
76 sessions for monkey 1 ( $n = 403$  candidate units), and 12 sessions for monkey 2 ( $n = 396$   
77 candidate units). Both monkeys performed many hundreds of trials during each session (~600-  
78 1000, corresponding to ~300-500 images each repeated twice). The data reported here  
79 correspond to the subset of images for which the monkeys' behavioral reports were recorded for  
80 both novel and familiar presentations (e.g. trials in which the monkeys did not prematurely break  
81 fixation during either the novel or the familiar presentation of an image). Finally, units were  
82 screened for stimulus-evoked activity via a comparison of their responses in a 200 ms period  
83 before stimulus onset (-200 ms – 0 ms) versus after stimulus onset (80 – 280 ms) with a two-  
84 sided t-test,  $p < 0.01$ . This yielded 353 (of 403) units for monkey 1 and 354 (out of 396) units for  
85 monkey 2.

86  
87 To perform our analyses, we concatenated units across sessions to create a larger  
88 pseudopopulation. In the case of the pooled data, this included 27 sessions in total (15 sessions  
89 from monkey 1 and 12 from monkey 2). When creating this pseudopopulation, we aligned data  
90 across sessions in a manner that preserved whether the trials were presented as novel or  
91 familiar, their n-back separation, and image memorability scores (obtained using methods  
92 described below). More specifically, the responses for each unit always contained sets of  
93 novel/familiar pairings of the same images, and pseudopopulation responses across units were  
94 always aligned for novel/familiar pairs that contained the same n-back separation and images  
95 with similar memorability scores. When the number of images in a session exceeded the  
96 number required to construct the pseudopopulation, a subset of images were selected  
97 separately for each n-back by ranking images within that n-back by their memorability scores,

98 preserving the lowest-ranked and highest-ranked images within that session, and selecting the  
99 number of additional images required as those with memorability scores that were evenly  
100 spaced between the two extreme memorability scores for that session. The resulting  
101 pseudopopulation consisted of the responses to 107 images presented as both novel and  
102 familiar (i.e. 15, 15, 16, 17, 17, 15 and 12 trials at 1, 2, 4, 8, 16, 32 and 64-back, respectively).  
103 To perform the neural analyses (Fig 2b, Supp Figs 2, 3), a memorability score for each of the  
104 107 pseudopopulation images was computed as the mean of the memorability scores across all  
105 the actual images that were aligned to produce that pseudopopulation response. The average  
106 standard deviation across the set of memorability scores used to produce each  
107 pseudopopulation response was 0.05, where memorability ranges 0-1. To perform behavioral  
108 analyses (Fig 2c, Supp Fig 4), the memorability score as well as binary performance values  
109 (correct/wrong at reporting that a familiar image was familiar) were retained for each of the 107  
110 images, across each of the 27 sessions.

111

### 112 **Human-based memorability scores for the images used in the monkey experiments**

113

114 We obtained memorability scores for the images used in the monkey experiments using  
115 MemNet [2] estimates. MemNet is a convolutional neural network (CNN) trained to estimate  
116 image memorability on a large-scale dataset of natural images (LaMem [2], publicly available at  
117 [memorability.csail.mit.edu](http://memorability.csail.mit.edu)). LaMem consists of 60K images drawn from a diverse range of  
118 sources (See [2] for more detail). Each image in this dataset is associated with a memorability  
119 score based on human performances in an online memory game on Amazon's Mechanical Turk.  
120 Behavioral performances were corrected for the delay interval between first and second  
121 presentation to produce a single memorability score for each image. After training, MemNet  
122 estimates visual memorability of natural images near the upper bound imposed by human  
123 performance: MemNet estimates reach 0.64 rank correlation with mean human-estimated  
124 memorability, while the upper bound of consistency between human scores has a rank  
125 correlation of 0.68. Here we treat MemNet memorability estimates as a proxy for human  
126 memorability scores.

127

128 The memorability scores were obtained using the network weights reported in [2] and publicly  
129 available at <http://memorability.csail.mit.edu/download.html>. This network was originally trained  
130 using the Caffe framework [3], and we ported the trained network to Pytorch [4] using the caffe-  
131 to-torch-to-pytorch package at [https://github.com/fanq15/caffe\\_to\\_torch\\_to\\_pytorch](https://github.com/fanq15/caffe_to_torch_to_pytorch). Before  
132 passing images into MemNet, we preprocessed them as described in [5]: we resized images to  
133 256 × 256 pixels (with bilinear interpolation), subtracted the mean RGB image intensity  
134 (computed over the dataset used for pretraining, as described in [5]), and then produced 10  
135 crops of size 227 × 227 pixels. The 10 crops were obtained by cropping the full image at the  
136 center and at each of the four corners and by flipping each of these 5 cropped images about the  
137 vertical axis. All 10 crops were passed through MemNet. The average of these 10 scores was  
138 used as the mean prediction of the model for the input image. This mean prediction was then  
139 linearly transformed to obtain the estimated memorability score:

140

141 
$$\text{Memorability\_score} = \min(\max((\text{output} - \text{mean\_pred}) * 2 + \text{additive\_mean}, 0), 1)$$

142

143 where following [2], we set mean\_pred = 0.7626 and additive\_mean = 0.65.

144

145 **The responses of units at different layers of CNN models trained to classify objects and**  
146 **scenes.**

147  
148 We evaluated the correlation between response magnitude and image memorability on images  
149 from the LaMem dataset [2] using three commonly used convolutional neural networks (CNNs).  
150 All reported models were evaluated on the full test set of split 1 of LaMem, which contains  
151 10,000 images. We chose to use LaMem images, as each image in this dataset is labeled with  
152 a memorability score computed directly from human behavioral performance (i.e. not estimated  
153 with a model; see above and [2] for details of data collection and memorability score  
154 computation). All networks were run in TensorFlow 1.10 ([6], software available  
155 from [tensorflow.org](http://tensorflow.org)), using custom Python evaluation code.

156  
157 The results presented in Fig 3 were obtained by running images from this dataset through  
158 HybridCNN [5]. HybridCNN is a network with an identical architecture to AlexNet [7]. HybridCNN  
159 was first trained to classify natural images of objects and scenes using data from the ImageNet  
160 Large Scale Visual Recognition Challenge (ILSVRC) 2012, a 1000-way object classification  
161 dataset [8], as well as the Places 183-way scene classification dataset [5], for a combined 1183-  
162 way classification task. For details of training, see [5]. Results were obtained using the network  
163 weights reported in [5] and publicly available at <http://places.csail.mit.edu/downloadCNN.html>.  
164 This network was originally trained using the Caffe framework [3], and we ported the trained  
165 network to TensorFlow using the caffe-tensorflow package [https://github.com/ethereon/caffe-](https://github.com/ethereon/caffe-tensorflow)  
166 [tensorflow](https://github.com/ethereon/caffe-tensorflow). Random initialization baselines were obtained using the same architecture, but  
167 randomly sampling the weights using the initialization algorithm described in [9].

168  
169 Before passing images into each network, we preprocessed them as described in [5] and  
170 above: we resized images to 256 × 256 pixels (with bilinear interpolation), subtracted the mean  
171 RGB image intensity (computed over the training dataset), and then cropped the central 227 x  
172 227 and passed it into the network. The response magnitude (L2 norm) of each layer was  
173 computed over the full output vector of each hidden layer. In all cases, we show the magnitude  
174 of hidden layer output after applying the nonlinear operation. Results for the two networks  
175 presented in the supplement (Supp Fig 5) were obtained in an identical manner, except for the  
176 image preprocessing step. For each network, images were preprocessed as described in the  
177 original papers (AlexNet: [7], VGG-16: [10]).

178  
179 For all three networks (HybridCNN, AlexNet, and VGG-16), we computed correlations for all  
180 convolutional and fully-connected hidden layers. The Pearson correlation coefficient was used  
181 to measure correlation. All correlations were computed over the full set of 10,000 images  
182 described above. 95% confidence intervals for the correlation coefficient of each layer were  
183 obtained by bootstrapping over the set of 10,000 per-image layer magnitudes and memorability  
184 scores. 95% confidence intervals were estimated empirically as the upper and lower 97.5%-  
185 centiles of the bootstrapped correlation coefficients for each layer and condition. Bootstrapped  
186 resampling was performed independently for each layer and each condition (trained or randomly  
187 connected). In all cases, bootstrap estimates were performed using 10,000 samples (with  
188 replacement) of the full dataset of 10,000 images. The bootstrapping procedure was also used  
189 to conduct one-tailed tests to determine whether the correlations between memorability and  
190 response magnitude were stronger in the trained as compared to the randomly initialized  
191 network at each layer separately. p-values were estimated by taking pairs of correlation  
192 coefficients computed on the bootstrapped data for each condition and measuring the rate at  
193 which the correlation for the random layer exceeded the correlation for the trained layer.

194 **REFERENCES:**

- 195
- 196 1. Meyer, T. and N.C. Rust, *Single-exposure visual memory judgments are reflected in*  
197 *inferotemporal cortex*. eLife, 2018. **7:e32259**.
- 198 2. Khosla, A., et al. *Understanding and predicting image memorability at a large scale*. in  
199 *International Conference on Computer Vision (ICCV)*. 2015.
- 200 3. Jia, Y., et al. *Caffe: convolutional architecture for fast feature embedding*. in *22nd ACM*  
201 *International conference on Multimedia (MM'14)*. 2014. New York.
- 202 4. Paszke, A., et al. *Automatic differentiation in PyTorch*. in *Neural Information Processing*  
203 *Systems (NIPS)*. 2017.
- 204 5. Zhou, B., et al. *Learning deep features for scene recognition using places database*. in  
205 *Neural Information Processing Systems (NIPS)*. 2014.
- 206 6. Abadi, M., et al., *TensorFlow: Large-Scale machine learning on heterogeneous distributed*  
207 *systems* 2016: arXiv.
- 208 7. Krizhevsky, A., I. Sutskever, and G.E. Hinton. *ImageNet classification with deep*  
209 *convolutional neural networks*. . in *International Conference on Neural Information Processing*  
210 *Systems (NIPS)*. 2012.
- 211 8. Deng, J., et al. *ImageNet: A large-scale hierarchical image database*. in *IEEE Computer*  
212 *Vision and Pattern Recognition (CVPR)*. 2009.
- 213 9. Giorot, X. and Y. Bengio. *Understanding the difficulty of training deep feedforward neural*  
214 *networks*. in *Proceedings of the Thirteenth International Conference on Artificial Intelligence and*  
215 *Statistics*. 2010.
- 216 10. Simonyan, K. and A. Zisserman. *Very deep convolutional networks for large-scale image*  
217 *recognition*. in *International Conference on Machine Learning (ICLR)*. 2015.  
218
